# Supplementary material for: SOXC proteins amplify canonical WNT signaling to secure nonchondrocytic fates in skeletogenesis
Source: PubMed Central journal article supplement — J Cell Biol. 2014 Dec 8;207(5):657–71. doi: 10.1083/jcb.201405098 (PMC4259807; doi:10.1083/jcb.201405098), 2014-12-08
Supplement: supp_jcb.201405098_JCB_201405098_sm.pdf [file supp_jcb.201405098_JCB_201405098_sm.pdf]

Bhattaram et al., <http://www.jcb.org/cgi/content/full/jcb.201405098/DC1>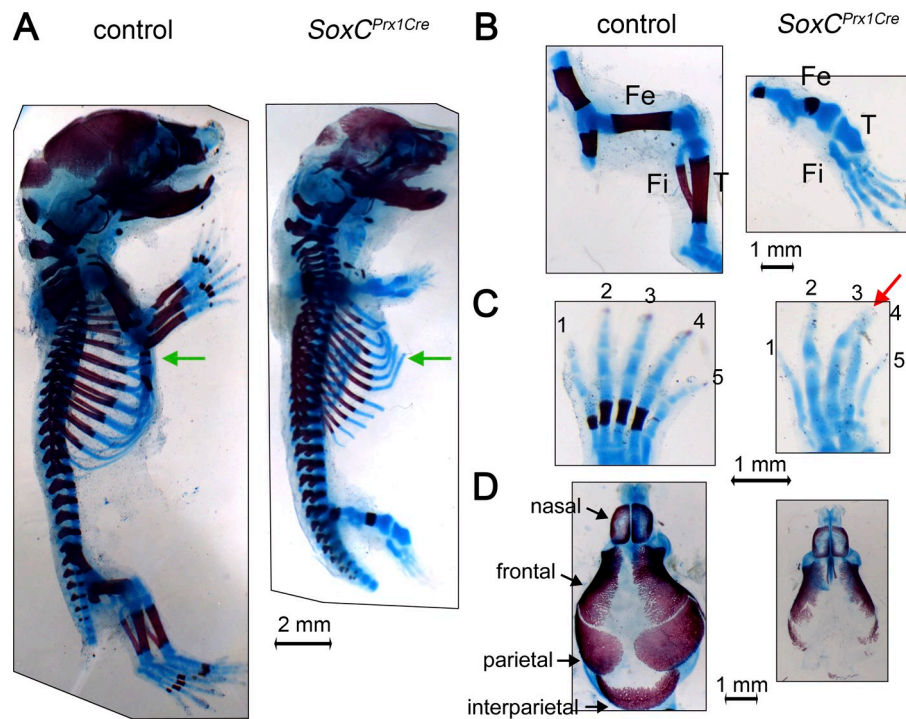

Figure S1. **Skeleton malformations in *SOXC* mutants.** Skeletons were stained with Alcian blue (nonmineralized cartilage) and Alizarin red (mineralized tissue). (A) Side views. (B and C) High-magnification views of hind limbs and hind paws, respectively. (D) Top views of heads. Fe, femur; Fi, fibula; T, tibia. Digits are numbered in the paws. The green arrow points to the sternum in the control and absence of sternum in the mutant. Red arrow, fusion of digits 3 and 4. Data were reproduced using more than three litters of control and mutant embryos.

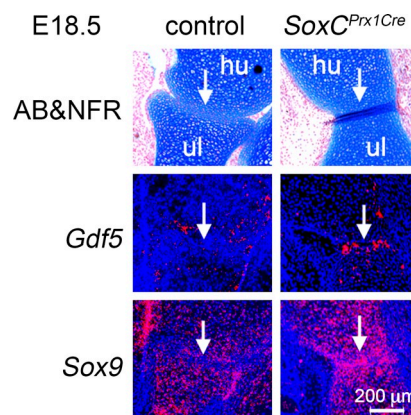

Figure S2. ***SOXC* genes secure the nonchondrocytic fate of joint cells.** Adjacent sections of elbow joints from E18.5 wild-type and *SoxC<sup>Prx1Cre</sup>* forelimbs were stained with alcian blue and nuclear fast red (AB&NFR) or were hybridized with RNA probes (red signals) and counterstained with DAPI (blue dye), as indicated. hu, humerus; ul, ulna. Arrows, elbow joint. Data were reproduced three times using samples from different embryos.

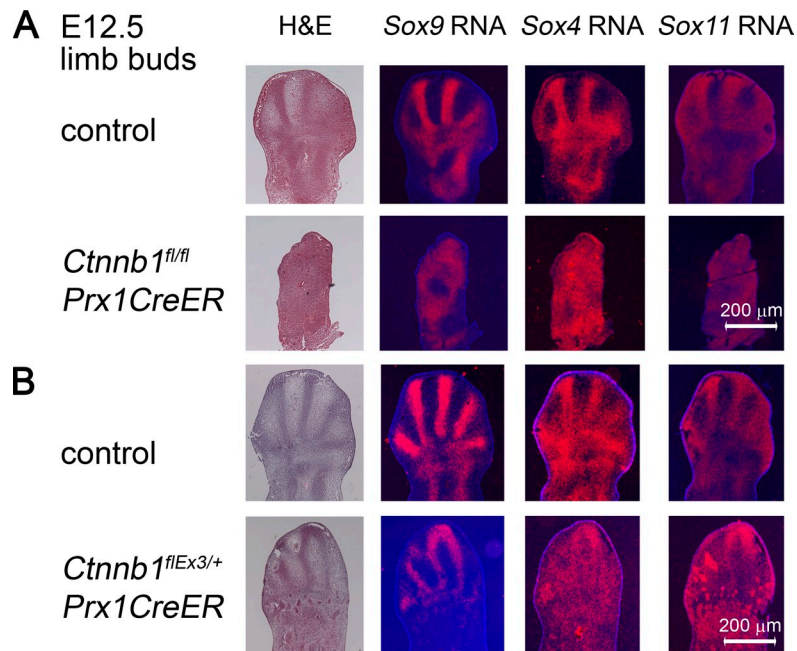

Figure S3. **SoxC** expression in *Ctnnb1* mutant limbs. (A and B) Limb bud sections from E12.5 control and *Ctnnb1*<sup>fl/fl</sup>*Prx1CreER* (A) and *Ctnnb1*<sup>flEx3/+</sup>*Prx1CreER* (B) were stained with hematoxylin and eosin (H&E) or hybridized with RNA probes, as indicated. Data were reproduced using three pairs of control and mutant embryos.

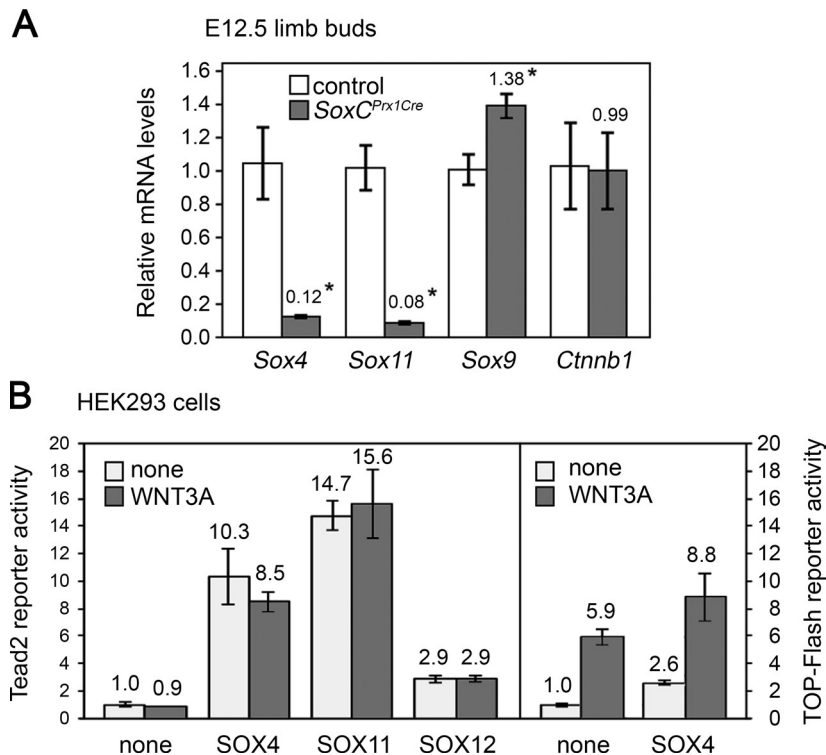

Figure S4. **Test of functional interaction between SOXC and  $\beta$ -catenin.** (A) *Sox4*, *Sox11*, *Sox9*, and *Ctnnb1* mRNA levels measured by qRT-PCR relative to *Gapdh* RNA level in limb buds from E12.5 control and *SoxC*<sup>*Prx1Cre*</sup> littermates. Each assay was performed using control and mutant embryos from three distinct litters. Data are presented as mean values with standard deviation. \*,  $P < 0.05$ . (B) SOXC-dependent Tead2 or  $\beta$ -catenin-dependent TOP-Flash reporter activities in HEK293 cells transfected with SOXC expression plasmids for 24 h. 20% WNT3A medium was added for the last 6 h. Normalized reporter activities are presented as mean values with standard deviation of triplicates in a representative experiment. TOP-Flash values prove that WNT3A medium was active. All data were reproduced in at least three independent experiments. Each panel shows the results of one representative experiment.

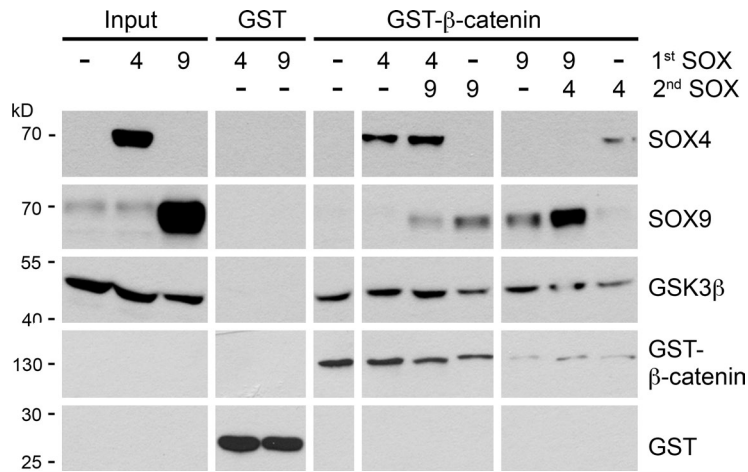

Figure S5. **Physical interaction of SOX proteins with  $\beta$ -catenin.** An in vitro GST pull-down assay was performed according to GST Protein Interaction Pull-Down kit (Thermo Fisher Scientific). In brief, 100 ng of purified GST protein (Sigma-Aldrich) or N-terminal GST- $\beta$ -catenin protein (Novus Biologicals) was bound to glutathione agarose beads for 2 h and was subsequently incubated for 16 h (first SOX) and then for 4 h (second SOX) with extracts from HEK293 cells expressing no exogenous protein (-), 3FLAG-SOX4 (4), or 3FLAG-SOX9 (9). Inputs and eluted proteins were detected by Western blotting. Western blots are shown for a representative experiment. Vertical white lines were added in blot pictures to indicate that the order of lanes was rearranged for clarity of presentation. The data are representative of those obtained in two independent experiments.

Table S1. **Frequency of syndactyly in *SoxC/Ctnnb1* partial and compound mutants**

| Phenotype                           | <i>Ctnnb1</i> |                 | <i>SoxC</i> |                 | <i>Ctnnb1/SoxC</i> compound mutants |
|-------------------------------------|---------------|-----------------|-------------|-----------------|-------------------------------------|
|                                     | Controls      | Partial mutants | Controls    | Partial mutants |                                     |
| Soft-tissue fusions in toes 3 and 4 | 0/6           | 0/6             | 0/9         | 2/9             | 9/11 <sup>a</sup>                   |
| Cartilage fusions in toes 3 and 4   | 0/6           | 0/6             | 0/9         | 0/9             | 6/11 <sup>a</sup>                   |

*Ctnnb1*<sup>fl/fl</sup>*Prx1CreER* males were bred with wild-type females to obtain control (no *Prx1CreER*) and *Ctnnb1*<sup>fl/+</sup>*Prx1CreER* (partial mutant) littermates. *Sox4*<sup>fl/fl</sup>*11*<sup>fl/fl</sup>*12*<sup>-/-</sup>*Prx1CreER* males were bred with *Sox11*<sup>fl/fl</sup>*Ctnnb1*<sup>fl/+</sup> females to obtain control, *Sox4*<sup>fl/+</sup>*11*<sup>fl/fl</sup>*12*<sup>+/-</sup>*Prx1CreER* (*SoxC* partial mutant) and *Sox4*<sup>fl/+</sup>*11*<sup>fl/fl</sup>*12*<sup>+/-</sup>*Ctnnb1*<sup>fl/+</sup>*Prx1CreER* (*SoxC/Ctnnb1* compound mutant) littermates. Pregnant females were injected with tamoxifen at gestation day 10.5, and embryos were analyzed at E14.5.

<sup>a</sup>P < 0.05, for mutants compared to controls or partial mutants, calculated using a two-tailed Fisher's exact test.

Table S2. **RNA probe plasmids**

| Gene          | Plasmid                                                                                                                                                                |
|---------------|------------------------------------------------------------------------------------------------------------------------------------------------------------------------|
| <i>Ccnd1</i>  | Mouse <i>Ccnd1</i> cDNA sequence cloned in pCR4-TOPO vector (Invitrogen). Forward primer, 5'-T CACAGCGGTAGGGATGAAATAG-3'; reverse primer, 5'-CTCTCAGACATGGCCCTAAAC-3'  |
| <i>Gdf5</i>   | Dy et al., 2010                                                                                                                                                        |
| <i>HoxD13</i> | Hérault et al., 1996                                                                                                                                                   |
| <i>Lef1</i>   | Mouse <i>Lef1</i> cDNA sequence cloned in pCR4-TOPO vector (Invitrogen). Forward primer, 5'-TGGCATCCCTCATCCAGCTATTGT-3'; reverse primer, 5'-AAGAGGTGGCAGTACTGTGCTT-3'  |
| <i>Msx1</i>   | Hill et al., 1989                                                                                                                                                      |
| <i>Sox4</i>   | Dy et al., 2008                                                                                                                                                        |
| <i>Sox11</i>  | Dy et al., 2008                                                                                                                                                        |
| <i>Sox12</i>  | Dy et al., 2008                                                                                                                                                        |
| <i>Sox9</i>   | Dy et al., 2010                                                                                                                                                        |
| <i>Tgfb2</i>  | Lawler et al., 1994                                                                                                                                                    |
| <i>Wnt4</i>   | Mouse <i>Wnt4</i> cDNA sequence cloned in pCR4-TOPO vector (Invitrogen). Forward primer, 5'-GCAGATGTGCAACCGAACCTTGA-3'; reverse primer, 5'-ATGTGGCTTGAAGTGTGCATTCCG-3' |
| <i>Wnt9a</i>  | Später et al., 2006                                                                                                                                                    |

Table S3. **Antibodies used in this study**

| Target                                 | Antibody type                     | Assay                        | Dilution       | Source, catalog no.                           |
|----------------------------------------|-----------------------------------|------------------------------|----------------|-----------------------------------------------|
| Axin1                                  | Rabbit, polyclonal                | Western blot                 | 1:2,000        | Cell Signaling Technology, 4691               |
| $\alpha$ -Tubulin                      | Mouse, monoclonal                 | Western blot                 | 1:5,000        | Abcam, ab7291                                 |
| Axin1                                  | Mouse, monoclonal                 | IP                           | 5 $\mu$ g/IP   | EMD Millipore, 2087                           |
| $\beta$ -Actin                         | Mouse, monoclonal                 | Western blot                 | 1:5,000        | Santa Cruz Biotechnology, Inc., sc-47778 (c4) |
| $\beta$ -Catenin                       | Mouse, monoclonal                 | Western blot; immunostaining | 1:1,000; 1:200 | BD, 610153                                    |
| p $\beta$ -Catenin (S33/37T41)         | Rabbit, polyclonal                | Western blot                 | 1:500          | Cell Signaling Technology, 9561               |
| p $\beta$ -Catenin (S45)               | Rabbit, polyclonal                | Western blot                 | 1:500          | Cell Signaling Technology, 9564               |
| Fibronectin                            | Mouse, monoclonal                 | Immunostaining               | 1:500          | Life Technologies, 132600                     |
| FLAG                                   | Mouse, monoclonal, HRP conjugated | Western blot                 | 1:1,000        | Sigma-Aldrich, A8952                          |
| GAPDH                                  | Mouse, HRP conjugated             | Western blot                 | 1:5,000        | Sigma-Aldrich, G9295                          |
| GST                                    | Mouse, monoclonal                 | Western blot                 | 1:2,000        | Santa Cruz Biotechnology, Inc., sc-374171     |
| GSK3 $\beta$                           | Rabbit, polyclonal                | Western blot                 | 1:1,000        | Cell Signaling Technology, 9315               |
| HDAC1                                  | Rabbit, polyclonal                | Western blot                 | 1:2,000        | Biovision, 3601                               |
| IgG, rabbit                            | Goat, HRP-conjugated              | Western blot                 | 1:5,000        | Bio-Rad Laboratories, 170-6515                |
| IgG, rabbit                            | Goat, Alexa Fluor 594 conjugated  | Immunostaining               | 1:200          | Life Technologies, A-11037                    |
| IgG, mouse                             | Goat, HRP conjugated              | Western blot                 | 1:2,000        | Bio-Rad Laboratories, 170-6516                |
| IgG, mouse                             | Nonimmune                         | IP                           | 5 $\mu$ g/IP   | EMD Millipore, 12-371                         |
| IgG, mouse                             | Goat, Alexa Fluor 488 conjugated  | Immunostaining               | 1:200          | Life Technologies, A11017                     |
| Na <sup>+</sup> /K <sup>+</sup> ATPase | Rabbit, polyclonal                | Western blot                 | 1:1,000        | Abcam, ab7671                                 |
| LRP6                                   | Rabbit, polyclonal                | Western blot                 | 1:1,000        | Cell Signaling Technology, 2568               |
| pLRP6                                  | Rabbit, polyclonal                | Western blot                 | 1:1,000        | Cell Signaling Technology, 3395               |
| SOX9                                   | Rabbit, polyclonal                | Western blot; immunostaining | 1:2,000; 1:200 | EMD Millipore, AB5535                         |

Table S4. **qRT-PCR primers**

| Gene           | Primer  | Sequence                     |
|----------------|---------|------------------------------|
| <i>mCtnnb1</i> | Forward | 5'-GATGTAGAGACAGCTCGTTGT-3'  |
|                | Reverse | 5'-GGCGTAGAACAGTACAGAATCC-3' |
| <i>mGapdh</i>  | Forward | 5'-GCACAGTCAAGGCCGAGAAT-3'   |
|                | Reverse | 5'-GCCTTCTCCATGGTGGTGAA-3'   |
| <i>mSox4</i>   | Forward | 5'-GCCTCCATCTTCGTACAACC-3'   |
|                | Reverse | 5'-AGTGAAGCGCGTCTACCTGT-3'   |
| <i>mSox11</i>  | Forward | 5'-ATCAAGCGCCCATGAAC-3'      |
|                | Reverse | 5'-TGCCCAGCCTCTTGAGAT-3'     |
| <i>mSox9</i>   | Forward | 5'-TCCACGAAGGTCTCTTCTC-3'    |
|                | Reverse | 5'-AGGAAGCTGGCAGACCAGTA-3'   |

Table S5. Reporter and expression plasmids

| Plasmid                          | Description                                                                                                                                                                                      |
|----------------------------------|--------------------------------------------------------------------------------------------------------------------------------------------------------------------------------------------------|
| FLAG-SOX4                        | Mouse SOX4 coding sequence cloned in frame with a N-terminal FLAG peptide in the pcDNA3.1 mammalian expression plasmid (Dy et al., 2008)                                                         |
| FLAG-SOX11                       | Mouse SOX11 coding sequence cloned in frame with a N-terminal FLAG peptide in pcDNA3.1 (Dy et al., 2008)                                                                                         |
| FLAG-SOX12                       | Mouse SOX12 coding sequence cloned in frame with a N-terminal FLAG peptide in pcDNA3.1 (Dy et al., 2008)                                                                                         |
| $\beta$ -Catenin-FLAG            | <i>Xenopus laevis</i> $\beta$ -Catenin coding sequence cloned in frame with two copies of a C-terminal FLAG peptide in the pCS2 mammalian expression plasmid (Lee et al., 2001)                  |
| Stabilized $\beta$ -catenin-FLAG | <i>Xenopus</i> $\beta$ -catenin coding sequence with S33A, S37A, and T45A point mutations, cloned in frame with two copies of a C-terminal FLAG peptide in pCS2 plasmid (Lee et al., 2001)       |
| 3FLAG-SOX4                       | Mouse SOX4 coding sequence cloned in frame with an N-terminal 3-copy-FLAG-linker peptide in pcDNA3.1                                                                                             |
| 3FLAG-SOX9                       | Human SOX9 coding sequence cloned in frame with an N-terminal 3-copy-FLAG-linker peptide in pcDNA3.1                                                                                             |
| 3FLAG-SOX11                      | Mouse SOX11 coding sequence cloned in frame with an N-terminal 3-copy-FLAG-linker peptide in pcDNA3.1                                                                                            |
| TOP-Flash                        | Eight copies of TCF/LEF binding sites cloned upstream of the firefly luciferase coding sequence in the pTA-Luc vector (Veeman et al., 2003)                                                      |
| <i>Tead2</i> reporter            | Mouse <i>Tead2</i> promoter and intron-1 sequence containing SOXC protein binding sites, cloned upstream of the firefly luciferase coding sequence in the pA3-Luc vector (Bhattaram et al, 2010) |
| pSV2 $\beta$ gal                 | <i>Escherichia coli lacZ</i> gene driven by SV40 regulatory elements (Promega)                                                                                                                   |
| pmaxGFP                          | GFP gene driven by the cytomegalovirus promoter (Lonza)                                                                                                                                          |

## References

- Bhattaram, P., A. Penzo-Méndez, E. Sock, C. Colmenares, K.J. Kaneko, A. Vassilev, M.L. Depamphilis, M. Wegner, and V. Lefebvre. 2010. Organogenesis relies on SoxC transcription factors for the survival of neural and mesenchymal progenitors. *Nat. Commun.* 1:1–12. <http://dx.doi.org/10.1038/ncomms1008>
- Dy, P., A. Penzo-Méndez, H. Wang, C.E. Pedraza, W.B. Macklin, and V. Lefebvre. 2008. The three SoxC proteins—Sox4, Sox11 and Sox12—exhibit overlapping expression patterns and molecular properties. *Nucleic Acids Res.* 36:3101–3117. <http://dx.doi.org/10.1093/nar/gkn162>
- Dy, P., P. Smits, A. Silvester, A. Penzo-Méndez, B. Dumitriu, Y. Han, C.A. de la Motte, D.M. Kingsley, and V. Lefebvre. 2010. Synovial joint morphogenesis requires the chondrogenic action of Sox5 and Sox6 in growth plate and articular cartilage. *Dev. Biol.* 341:346–359. <http://dx.doi.org/10.1016/j.ydbio.2010.02.024>
- Hérault, Y., S. Hraba-Renevey, F. van der Hoeven, and D. Duboule. 1996. Function of the *Evx-2* gene in the morphogenesis of vertebrate limbs. *EMBO J.* 15:6727–6738.
- Hill, R.E., P.F. Jones, A.R. Rees, C.M. Sime, M.J. Justice, N.G. Copeland, N.A. Jenkins, E. Graham, and D.R. Davidson. 1989. A new family of mouse homeo box-containing genes: molecular structure, chromosomal location, and developmental expression of *Hox-7.1*. *Genes Dev.* 3:26–37. <http://dx.doi.org/10.1101/gad.3.1.26>
- Lawler, S., A.F. Candia, R. Ebner, L. Shum, A.R. Lopez, H.L. Moses, C.V. Wright, and R. Derynck. 1994. The murine type II TGF- $\beta$  receptor has a coincident embryonic expression and binding preference for TGF- $\beta$ 1. *Development.* 120:165–175.
- Lee, E., A. Salic, and M.W. Kirschner. 2001. Physiological regulation of  $\beta$ -catenin stability by Tcf3 and CK1 $\epsilon$ . *J. Cell Biol.* 154:983–993. <http://dx.doi.org/10.1083/jcb.200102074>
- Später, D., T.P. Hill, R.J. O'sullivan, M. Gruber, D.A. Conner, and C. Hartmann. 2006. Wnt9a signaling is required for joint integrity and regulation of Ihh during chondrogenesis. *Development.* 133:3039–3049. <http://dx.doi.org/10.1242/dev.02471>
- Veeman, M.T., D.C. Slusarski, A. Kaykas, S.H. Louie, and R.T. Moon. 2003. Zebrafish prickles, a modulator of noncanonical Wnt/Fz signaling, regulates gastrulation movements. *Curr. Biol.* 13:680–685. [http://dx.doi.org/10.1016/S0960-9822\(03\)00240-9](http://dx.doi.org/10.1016/S0960-9822(03)00240-9)
